# Supplementary material
Source: PubMed Central journal article supplement (PMC3508386)
Supplement: NIHMS390798-supplement-01.pdf [file NIHMS390798-supplement-01.pdf]

**Table 1. Characteristics of Participants at Each Exam in the Beaver Dam Eye Study**

| Risk Factor                                  | Exam 1 (1988-1990) |                   | Exam 2 (1993-1995) |                   | Exam 3 (1998-2000) |                   | Exam 4 (2003-2005) |                   | P value* |
|----------------------------------------------|--------------------|-------------------|--------------------|-------------------|--------------------|-------------------|--------------------|-------------------|----------|
|                                              | N                  | Mean (SD)<br>or % |          |
| Age (years)                                  | 4518               | 61.4 (11.0)       | 3242               | 64.5 (10.1)       | 2349               | 67.6 (9.2)        | 1820               | 70.5 (8.3)        | <.001    |
| Sex (male)                                   | 4518               | 44.1              | 3242               | 44.1              | 2349               | 43.0              | 1820               | 42.3              | 0.26     |
| Central retinal arteriolar equivalent (μm)   | 4505               | 149.9 (14.8)      | 3228               | 148.5 (15.0)      | 2340               | 148.2 (14.5)      | 1815               | 146.5 (14.8)      | <.001    |
| Central retinal venular equivalent (μm)      | 4518               | 230.3 (23.1)      | 3242               | 224.1 (22.6)      | 2349               | 225.4 (22.5)      | 1820               | 217.8 (22.5)      | <.001    |
| Nuclear cataract present†                    | 4301               | 13.3              | 2982               | 4.9               | 2098               | 5.0               | 1532               | 2.4               | <.001    |
| History of cataract surgery                  | 4518               | 3.5               | 3240               | 6.5               | 2349               | 9.9               | 1820               | 14.8              | <.001    |
| Refraction (diopters)                        | 4512               | 0.3 (2.5)         | 3227               | 0.3 (2.4)         | 2340               | 0.2 (2.4)         | 1819               | 0.2 (2.3)         | <.001    |
| Height (inches)                              | 4498               | 65.5 (3.7)        | 3204               | 65.3 (3.7)        | 2328               | 65.3 (3.7)        | 1810               | 64.9 (3.8)        | <.001    |
| Mean arterial blood pressure (mmHg)          | 4516               | 95.6 (12.2)       | 3227               | 93.8 (11.8)       | 2343               | 93.2 (11.5)       | 1819               | 92.6 (11.8)       | <.001    |
| Hypertension present                         | 4513               | 49.3              | 3221               | 49.0              | 2345               | 56.3              | 1819               | 63.2              | 0.05     |
| Intraocular pressure (mmHg)                  | 4505               | 15.4 (3.3)        | 3219               | 15.4 (3.2)        | 2337               | 15.2 (3.0)        | 1813               | 15.1 (3.2)        | <.001    |
| Body mass index (kg/m <sup>2</sup> )         | 4496               | 28.7 (5.4)        | 3195               | 29.5(5.5)         | 2326               | 29.9 (5.9)        | 1809               | 30.5 (6.0)        | <.001    |
| History of cardiovascular disease            | 4453               | 13.7              | 3225               | 13.4              | 2345               | 15.5              | 1819               | 15.9              | <.001    |
| Diabetes present                             | 4501               | 7.2               | 3200               | 8.4               | 2318               | 9.6               | 1805               | 13.0              | <.001    |
| Glycosylated hemoglobin (%)                  | 4501               | 6.0 (1.4)         | 3200               | 6.3 (1.4)         | 2314               | 6.3 (1.2)         |                    | Not measured      | <.001    |
| Total cholesterol (mg/dL)                    | 4502               | 233.9 (40.0)      | 3211               | 239.7 (45.0)      | 2326               | 213.6 (40.2)      |                    | Not measured      | <.001    |
| High density lipoprotein cholesterol (mg/dL) | 4499               | 52.2 (17.7)       | 3204               | 52.5 (16.4)       | 2273               | 50.7 (16.5)       |                    | Not measured      | 0.006    |
| Taking nonsteroidal anti-inflammatory drugs  | 4518               | 32.7              | 3242               | 58.3              | 2349               | 44.9              | 1820               | 75.7              | <.001    |
| Taking aspirin                               | 4514               | 21.8              | 3237               | 27.4              | 2345               | 39.2              | 1819               | 51.0              | <.001    |
| Current heavy drinking                       | 4506               | 2.4               | 3233               | 2.0               | 2347               | 1.5               | 1819               | 0.8               | 0.01     |
| Current smoking                              | 4515               | 20.2              | 3235               | 15.1              | 2349               | 10.4              | 1820               | 9.3               | <.001    |
| Pack-years smoked‡                           | 2487               | 31.7 (28.7)       | 1746               | 30.2 (27.3)       | 1268               | 28.3 (27.0)       | 937                | 27.2 (26.1)       | <.001    |
| Years since stopped smoking§                 | 1593               | 16.1 (11.9)       | 1280               | 18.6 (12.8)       | 1027               | 22.2 (13.5)       | 784                | 25.6 (14.0)       | <.001    |
| Years smoked‡                                | 2498               | 27.3 (14.6)       | 1755               | 28.0 (15.2)       | 1271               | 27.1 (15.6)       | 943                | 27.7 (15.9)       | <.001    |
| Chronic kidney disease present               | 4477               | 3.9               | 3165               | 3.8               | 2295               | 4.0               | 1486               | 6.0               | 0.008    |
| Serum creatinine (mg/dL)                     | 4477               | 0.9 (0.3)         | 3165               | 0.9 (0.3)         | 2295               | 0.9 (0.2)         | 1486               | 0.9 (0.3)         | <.001    |
| eGFR (mL/min/1.73 m <sup>2</sup> )           | 4477               | 76.5 (18.2)       | 3165               | 75.5 (16.9)       | 2295               | 73.9 (16.7)       | 1486               | 73.2 (17.9)       | <.001    |
| White blood cell count (1000/μL)             | 4503               | 7.4 (2.1)         | 3210               | 7.4 (2.1)         |                    | Not measured      |                    | Not measured      |          |
| Serum 8-isoprostane (pg/mL)¶                 | 1600               | 143.7 (87.6)      | 1154               | 132.4 (69.6)      |                    | Not measured      |                    | Not measured      |          |
| Serum sVCAM-1 (ng/mL)¶                       | 1631               | 822.2 (293.8)     | 1158               | 852.1 (277.9)     |                    | Not measured      |                    | Not measured      |          |
| Serum C-reactive protein (mg/L)              | 4477               | 4.4 (9.7)         | 1158               | 4.6 (11.2)        |                    | Not measured      |                    | Not measured      |          |

eGFR, estimated glomerular filtration rate; SD, standard deviation; sVCAM-1, soluble vascular cell adhesion molecule-1.

\* Adjusted for age; † Presence defined as nuclear sclerosis greater than photograph standard 2; ‡ Measured in past and current smokers only; § Measured in past smokers only; || Measured only in a subset of participants at exam 2; ¶ Measured only in a subset of participants at exams 1 and 2.
