# Supplementary material
Source: PubMed Central journal article supplement (PMC3508386)
Supplement: NIHMS390798-supplement-02.pdf [file NIHMS390798-supplement-02.pdf]

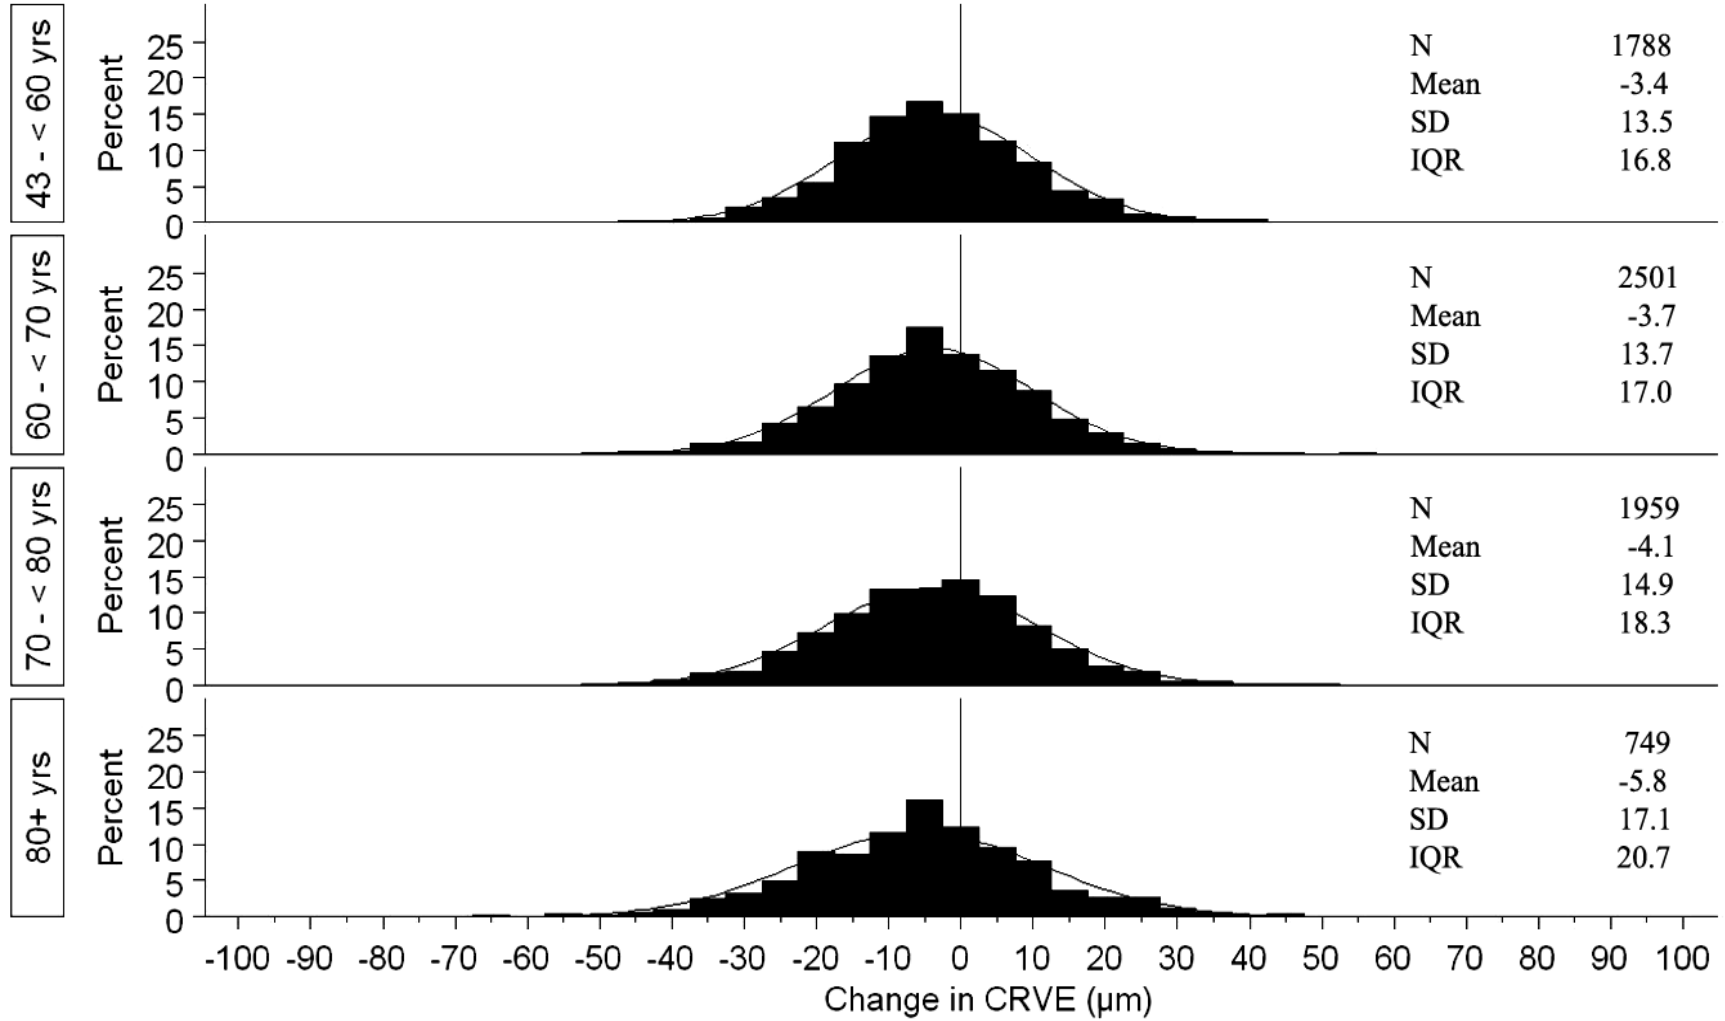

Figure 2. Change in central retinal venular equivalent (CRVE) by age in the Beaver Dam Eye Study. IQR, interquartile range; SD, standard deviation.
