# Supplementary material
Source: PubMed Central journal article supplement (PMC3508386)
Supplement: NIHMS390798-supplement-03.pdf [file NIHMS390798-supplement-03.pdf]

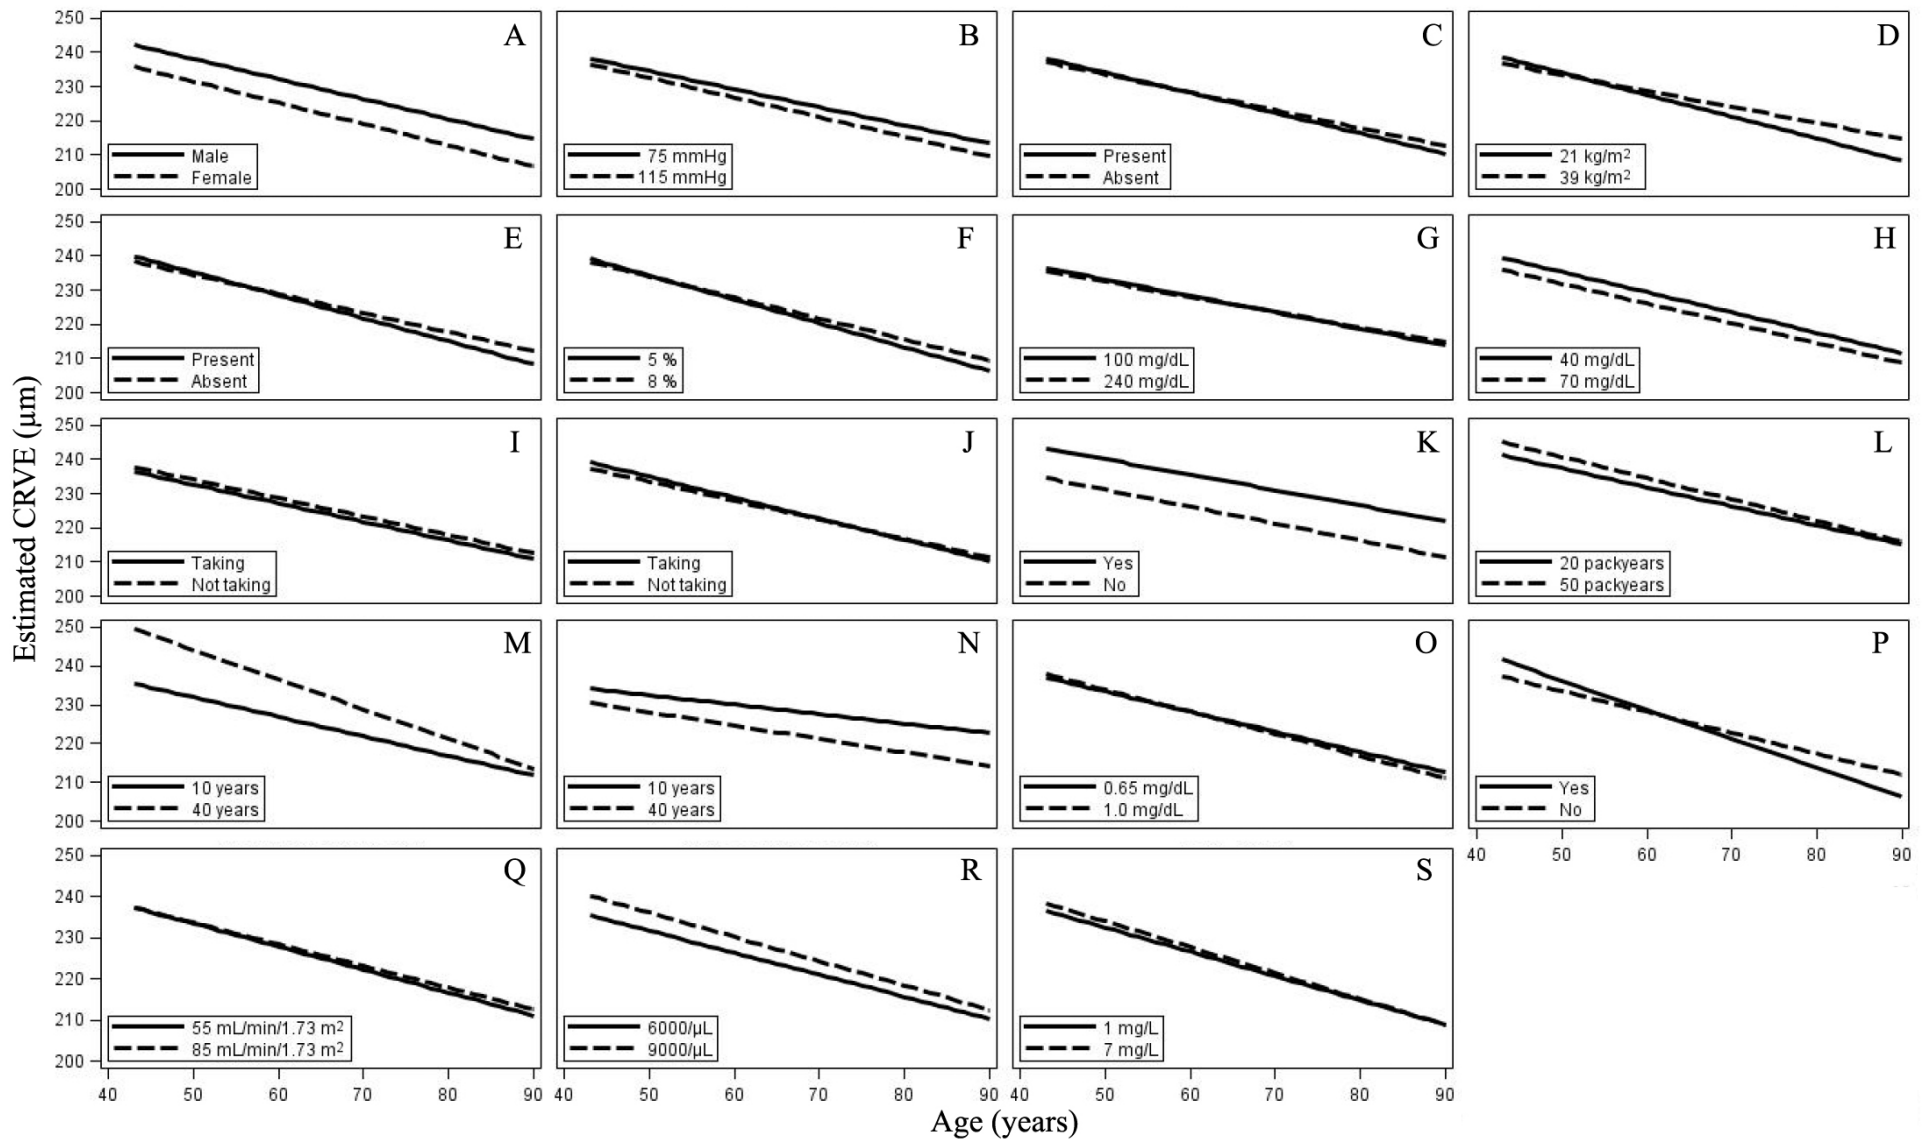

Figure 4. Estimated central retinal venular equivalent (CRVE) for persons ages 43 to 90, stratified by risk level (dotted/solid lines) for all risk factors associated with concurrent CRVE or change in CRVE. A. Sex; B. Mean arterial blood pressure; C. Hypertension status;

D. Body mass index; E. History of cardiovascular disease; F. Glycosylated hemoglobin; G. Serum total cholesterol; H. Serum high-density lipoprotein cholesterol; I. Nonsteroidal anti-inflammatory drug use; J. Aspirin use; K. Current smoking; L. Pack-years smoked; M. Years smoked; N. Years since stopping smoking; O. Serum creatinine; P. Chronic kidney disease status; Q. Estimated glomerular filtration rate; R. White blood cell count; S. C-reactive protein.
